# Supplementary material
Source: PubMed Central journal article supplement (PMC2783749)
Supplement: NIHMS151179-supplement-1_si_001.pdf [file NIHMS151179-supplement-1_si_001.pdf]

Supporting Information for

**Abasic Site-Containing DNzyme and Aptamer for Label-free  
Fluorescent Detection of Pb<sup>2+</sup> and Adenosine with High Sensitivity,  
Selectivity and Tunable Dynamic Range**

*Yu Xiang,<sup>1,2</sup> Aijun Tong<sup>\*,1</sup> and Yi Lu<sup>\*,2</sup>*

<sup>1</sup> Department of Chemistry, Tsinghua University, Beijing 100084, PR China, and

<sup>2</sup>Department of Chemistry, University of Illinois at Urbana-Champaign, Urbana, IL  
61801, USA

\*To whom correspondence should be addressed: [yi-lu@illinois.edu](mailto:yi-lu@illinois.edu) and  
[tongaj@mail.tsinghua.edu.cn](mailto:tongaj@mail.tsinghua.edu.cn)

## **Content**

### **Page S2:**

Figure S1. Activity assay of the 8-17 DNzyme and its abasic-site containing variants using denatured PAGE (20 % acrylic amide).

Figure S2. Effect of mutation in abasic-site containing 17E<sub>ab</sub> on the kinetics of fluorescence enhancement by Pb<sup>2+</sup>-catalyzed cleavage of 17S.

### **Page S3**

Figure S3. Kinetics of fluorescence enhancement by Pb<sup>2+</sup>-catalyzed cleavage at lower Pb<sup>2+</sup> concentration range.

Figure S4. Effect of mutations in adenosine aptamer AAP on the fluorescence enhancement ratio upon binding with different concentrations of adenosine.

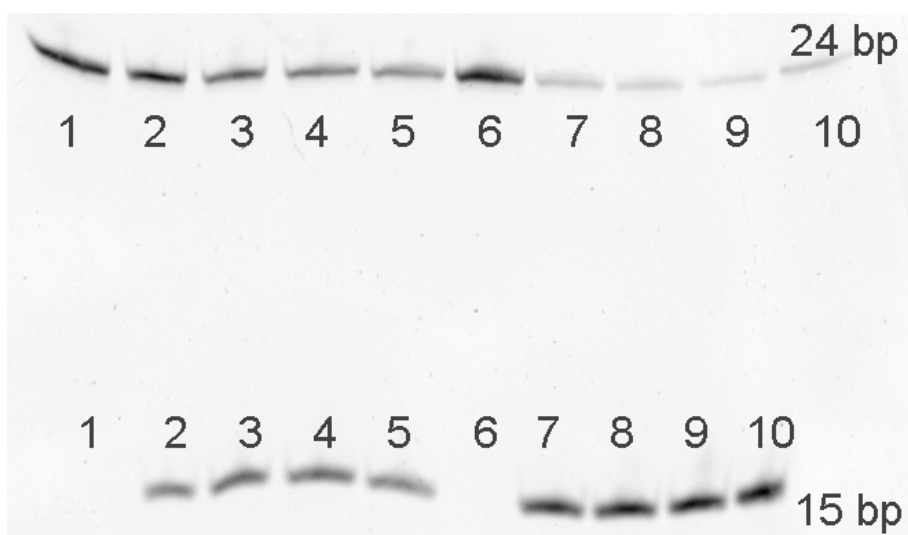

**Figure S1.** Activity assay of the 8-17 DNAzyme and its abasic-site containing variants using denatured PAGE (20 % acrylic amide). The 24 base pair (bp) substrate 17S ((1  $\mu\text{M}$ ) was fluorescein-labeled at 3'- end. The assay was carried out in the presence of 2  $\mu\text{M}$  DNAzymes and 1  $\mu\text{M}$   $\text{Pb}^{2+}$  in 25 mM HEPES pH 7.0, 100 mM NaCl, at 5  $^{\circ}\text{C}$  for 10 minutes. 1: no DNAzyme; 2,3: 17E<sub>ab</sub>; 4,5: 17E<sub>G</sub>-G; 6: Mutant 17E<sub>ab</sub>; 7,8: 17E<sub>ab</sub> with 2  $\mu\text{M}$  ATMND; 9,10: 17E<sub>G</sub>.

Sequences:

17E<sub>G</sub>-G (17E<sub>G</sub> with G base removed from 3'- end):

5'-ACAGACATCTCTTCTCCGAGCCGGTTCGAAATAGGGA-3'

Mutant 17E<sub>ab</sub> (17E<sub>ab</sub> with T replaced by underlined C):

5'-ACAGACATCTCTTCCCCGAGCCGGTTCGAAATAGXGAG-3'

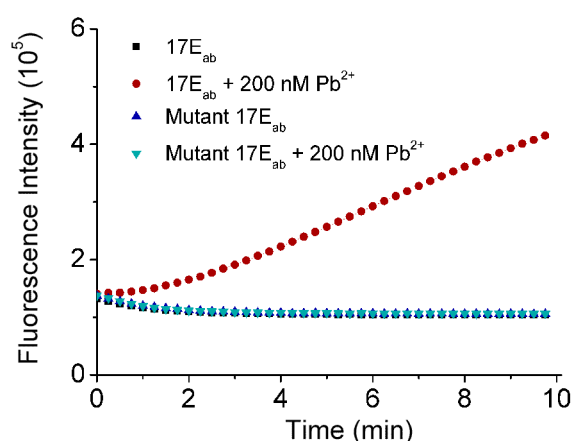

**Figure S2.** Effect of mutation in abasic-site containing 17E<sub>ab</sub> on the kinetics of fluorescence enhancement by  $\text{Pb}^{2+}$ -catalyzed cleavage of 17S. Condition: 1  $\mu\text{M}$  ATMND, 1  $\mu\text{M}$  17S, 2  $\mu\text{M}$  DNAzyme, 0 or 200 nM  $\text{Pb}^{2+}$ , 25 mM HEPES pH 7.0, 100 mM NaCl, at 5  $^{\circ}\text{C}$ .  $\lambda_{\text{ex}}/\lambda_{\text{em}} = 358/405$  nm.

Sequences:

Mutant 17E<sub>ab</sub> (17E<sub>ab</sub> with T replaced by underlined C):

5'-ACAGACATCTCTTCCCCGAGCCGGTTCGAAATAGXGAG-3'

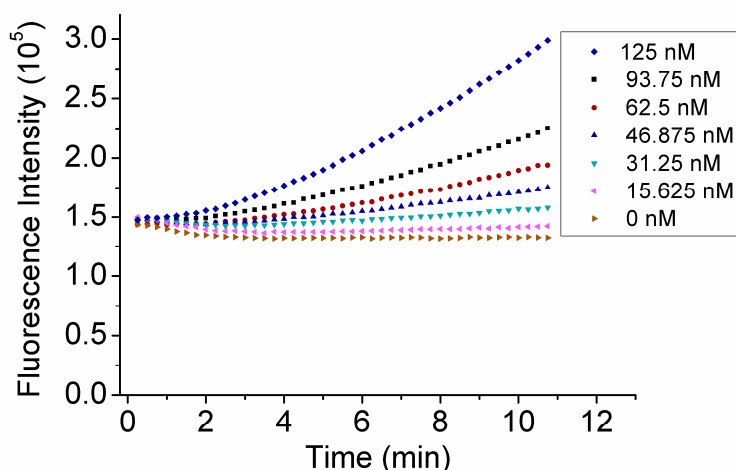

**Figure S3.** Kinetics of fluorescence enhancement by  $\text{Pb}^{2+}$ -catalyzed cleavage at lower  $\text{Pb}^{2+}$  concentration range.  $\lambda_{\text{ex}}/\lambda_{\text{em}} = 358/405$  nm. Condition:  $1 \mu\text{M}$  ATMND,  $2.14 \mu\text{M}$   $17\text{E}_{\text{ab}}$ ,  $1.02 \mu\text{M}$   $17\text{S}$  in  $25 \text{ mM}$  HEPES pH 7.0,  $100 \text{ mM}$  NaCl at  $5 \text{ }^\circ\text{C}$ . The decrease of fluorescence during the first 2 minutes is because the  $\text{Pb}^{2+}$  stock solution added at 0 minute is at room temperature and 2 minutes is required for the equilibrium of temperature.

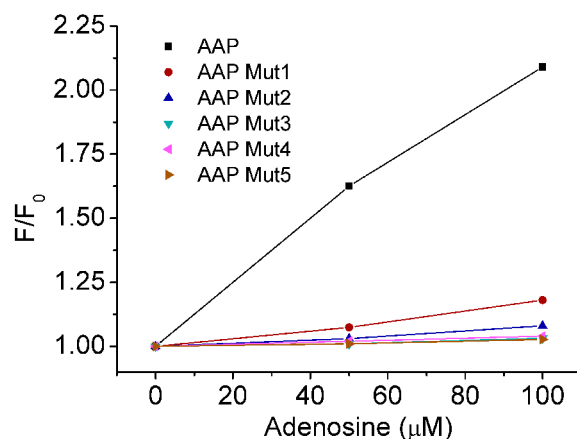

**Figure S4.** Effect of mutations in adenosine aptamer AAP on the fluorescence enhancement ratio upon binding with different concentrations of adenosine. Condition:  $500 \text{ nM}$  ATMND,  $1 \mu\text{M}$  APP or APP mutants,  $1.25 \mu\text{M}$   $\text{L1}_{\text{ab}}$ ,  $0, 50$  or  $100 \mu\text{M}$  adenosine,  $10 \text{ mM}$  HEPES pH 7.0,  $100 \text{ mM}$  NaCl,  $1 \text{ mM}$  EDTA, at  $5 \text{ }^\circ\text{C}$ .  $\lambda_{\text{ex}}/\lambda_{\text{em}} = 358/405$  nm.

Sequences (Mutation sites compared to APP are underlined, where in APP is A base):

APP Mut1: 5'-TGTCGTTGACCTGGGGGAGTATTGCGGAGGGAGGT-3'

APP Mut2: 5'-TGTCGTTGACCTGGGGGCGTATTGCGGAGGAAGGT-3'

APP Mut3: 5'-TGTCGTTGACCTGGGGGAGTATTGCGGAGGCAGGT-3'

APP Mut4: 5'-TGTCGTTGACCTGGGGGAGTATTGCGGAGGTAGGT-3'

APP Mut5: 5'-TGTCGTTGACCTGGGGGTGATTGCGGAGGAAGGT-3'
